# Supplementary material for: The Experimentally Obtained Functional Impact Assessments of 5' Splice Site GT'GC Variants Differ Markedly from Those Predicted
Source: PubMed Central journal article supplement — Curr Genomics. 2020 Jan;21(1):56–66. doi: 10.2174/1389202921666200210141701 (PMC7324893; doi:10.2174/1389202921666200210141701), 2020-01
Supplement: CG-21-56_SD1.pdf [file CG-21-56_SD1.pdf]

## Supplementary Material

## The Experimentally Obtained Functional Impact Assessments of 5' Splice Site GT&gt;GC Variants Differ Markedly from Those Predicted

Jian-Min Chen<sup>1,\*</sup>, Jin-Huan Lin<sup>1,2,3</sup>, Emmanuelle Masson<sup>1,4</sup>, Zhuan Liao<sup>2,3</sup>, Claude Férec<sup>1,4</sup>, David N. Cooper<sup>5</sup> and Matthew Hayden<sup>5</sup>

<sup>1</sup>EFS, Univ Brest, Inserm, UMR 1078, GGB, F-29200 Brest, France; <sup>2</sup>Department of Gastroenterology, Changhai Hospital, Second Military Medical University, Shanghai, China; <sup>3</sup>Shanghai Institute of Pancreatic Diseases, Shanghai, China; <sup>4</sup>CHRU Brest, Service de Génétique Médicale et de Biologie de la Reproduction, Brest, France; <sup>5</sup>Institute of Medical Genetics, School of Medicine, Cardiff University, Cardiff, UK

**Supplementary Table S1.** Comparison of SpliceAI-predicted and experimentally demonstrated functional effects of the 45 disease-causing GT>GC (+2T>C) variants\*

| Gene symbol    | mRNA reference | Chr.  | HG38 coordinate | Reference sequence | Variant                 | Generation of wild-type transcripts <sup>a</sup> | SpliceAI Delta score of donor loss |       |       |
|----------------|----------------|-------|-----------------|--------------------|-------------------------|--------------------------------------------------|------------------------------------|-------|-------|
|                |                |       |                 |                    |                         |                                                  | +2T>C                              | +2T>A | +2T>G |
| <i>ABCC2</i>   | NM_000392.5    | chr10 | 99811604        | T                  | c.1967+2T>C             | No                                               | 0.97                               | 0.98  | 0.98  |
| <i>ACAT1</i>   | NM_000019.3    | chr11 | 108146361       | T                  | c.1163+2T>C             | No                                               | 0.99                               | 1     | 1     |
| <i>COQ8A</i>   | NM_020247.4    | chr1  | 226984237       | T                  | c.1398+2T>C             | No                                               | 0.99                               | 1     | 1     |
| <i>ALB</i>     | NM_000477.6    | chr4  | 73417671        | T                  | c.1428+2T>C             | No                                               | 0.95                               | 1     | 1     |
| <i>AR</i>      | NM_000044.4    | chrX  | 67711691        | T                  | c.2173+2T>C             | No                                               | 0.99                               | 0.99  | 0.99  |
| <i>ART4</i>    | NM_021071.3    | chr12 | 14842968        | A                  | c.144+2T>C              | No                                               | 0.97                               | 0.99  | 0.99  |
| <i>ATP7A</i>   | NM_000052.6    | chrX  | 78011254        | T                  | c.1946+2T>C             | No                                               | 0.96                               | 0.96  | 0.96  |
| <i>B9D1</i>    | NM_015681.4    | chr17 | 19347782        | A                  | c.341+2T>C              | No                                               | 0.99                               | 0.99  | 0.99  |
| <i>BTK</i>     | NM_000061.2    | chrX  | 101362171       | A                  | c.588+2T>C              | No                                               | 0.99                               | 0.99  | 0.99  |
| <i>C8orf37</i> | NM_177965.3    | chr8  | 95269033        | A                  | c.155+2T>C              | No                                               | 0.92                               | 0.92  | 0.92  |
| <i>CAV3</i>    | NM_001234.4    | chr3  | 8733992         | T                  | c.114+2T>C              | Yes (11%) <sup>b</sup>                           | 0.9                                | 1     | 1     |
| <i>CD3E</i>    | NM_000733.3    | chr11 | 118313876       | T                  | c.520+2T>C              | Yes (1-5%) <sup>c</sup>                          | 0.99                               | 0.99  | 0.99  |
| <i>CD40LG</i>  | NM_000074.2    | chrX  | 136654432       | T                  | c.346+2T>C              | Yes (15%) <sup>c</sup>                           | 0.95                               | 0.97  | 0.97  |
| <i>CLCN5</i>   | NM_000084.4    | chrX  | 50072590        | T                  | c.205+2T>C              | No                                               | 0.92                               | 0.92  | 0.92  |
| <i>COL1A2</i>  | NM_000089.3    | chr7  | 94426532        | T                  | c.3105+2T>C             | No                                               | 0.99                               | 1     | 1     |
| <i>DGAT1</i>   | NM_012079.5    | chr8  | 144318093       | A                  | c.751+2T>C              | No                                               | 0.99                               | 0.99  | 0.99  |
| <i>DMD</i>     | NM_004006.2    | chrX  | 31657988        | A                  | c.8027+2T>C             | Yes (10%) <sup>c</sup>                           | 0.63                               | 0.99  | 0.99  |
| <i>DMD</i>     | NM_004006.2    | chrX  | 31206580        | A                  | c.9649+2T>C             | No                                               | 0.99                               | 0.99  | 0.99  |
| <i>DNAL4</i>   | NM_005740.2    | chr22 | 38780924        | A                  | c.153+2T>C              | No                                               | 0.98                               | 0.99  | 0.99  |
| <i>GAA</i>     | NM_000152.4    | chr17 | 80117111        | T                  | c.2331+2T>C             | No                                               | 0.94                               | 0.97  | 0.97  |
| <i>HESX1</i>   | NM_003865.2    | chr3  | 57198751        | A                  | c.357+2T>C <sup>d</sup> | No                                               | 0.92                               | 0.93  | 0.93  |
| <i>IL10RA</i>  | NM_001558.3    | chr11 | 117994151       | T                  | c.688+2T>C              | No                                               | 0.96                               | 0.97  | 0.97  |
| <i>ITGA8</i>   | NM_003638.2    | chr10 | 15531048        | A                  | c.2982+2T>C             | No                                               | 0.95                               | 0.99  | 0.99  |
| <i>IVD</i>     | NM_002225.3    | chr15 | 40410799        | T                  | c.456+2T>C              | No                                               | 0.71                               | 1     | 1     |
| <i>JAK3</i>    | NM_000215.3    | chr19 | 17834569        | A                  | c.2350+2T>C             | No                                               | 0.71                               | 0.97  | 0.99  |
| <i>LAMA2</i>   | NM_000426.3    | chr6  | 129315952       | T                  | c.3924+2T>C             | No                                               | 0.97                               | 0.97  | 0.97  |

|                |                |       |           |   |                         |                        |      |      |      |
|----------------|----------------|-------|-----------|---|-------------------------|------------------------|------|------|------|
| <i>LMAN1</i>   | NM_005570.3    | chr18 | 59338758  | A | c.1149+2T>C             | No                     | 0.97 | 0.97 | 0.97 |
| <i>MCM9</i>    | NM_017696.2    | chr6  | 118827925 | A | c.1732+2T>C             | No                     | 0.95 | 0.95 | 0.95 |
| <i>MMP2</i>    | NM_004530.5    | chr16 | 55485429  | T | c.658+2T>C              | No                     | 0.9  | 1    | 1    |
| <i>NCAPD2</i>  | NM_014865.3    | chr12 | 6531078   | T | c.4120+2T>C             | No                     | 0.88 | 1    | 1    |
| <i>NCF2</i>    | NM_001127651.2 | chr1  | 183586893 | A | c.257+2T>C              | No                     | 0.99 | 0.99 | 0.99 |
| <i>OPHN1</i>   | NM_002547.2    | chrX  | 68432865  | A | c.154+2T>C              | No                     | 0.81 | 1    | 1    |
| <i>OTC</i>     | NM_000531.5    | chrX  | 38401430  | T | c.540+2T>C              | No                     | 0.98 | 1    | 1    |
| <i>PCCB</i>    | NM_000532.4    | chr3  | 136250560 | T | c.183+2T>C              | No                     | 0.99 | 0.99 | 0.99 |
| <i>PCCB</i>    | NM_000532.4    | chr3  | 136328859 | T | c.1498+2T>C             | No                     | 1    | 1    | 1    |
| <i>PEX16</i>   | NM_004813.2    | chr11 | 45910896  | A | c.952+2T>C              | No                     | 0.97 | 0.99 | 0.99 |
| <i>PLP1</i>    | NM_000533.4    | chrX  | 103787968 | T | c.622+2T>C              | No                     | 0.95 | 0.96 | 0.96 |
| <i>PLP1</i>    | NM_000533.4    | chrX  | 103788512 | T | c.696+2T>C              | Yes (8%) <sup>b</sup>  | 0.74 | 1    | 1    |
| <i>PNPLA2</i>  | NM_020376.3    | chr11 | 823589    | T | c.757+2T>C              | No                     | 0.95 | 0.99 | 0.99 |
| <i>PRDM5</i>   | NM_018699.3    | chr4  | 120922514 | A | c.93+2T>C               | No                     | 0.73 | 1    | 0.99 |
| <i>RFX6</i>    | NM_173560.3    | chr6  | 116877954 | T | c.380+2T>C              | No                     | 0.9  | 0.9  | 0.9  |
| <i>SCLT1</i>   | NM_144643.3    | chr4  | 129039039 | A | c.290+2T>C              | No                     | 0.95 | 0.95 | 0.95 |
| <i>SH2D1A</i>  | NM_002351.4    | chrX  | 124346781 | T | c.137+2T>C              | No                     | 0.96 | 0.98 | 0.98 |
| <i>SLC26A2</i> | NM_000112.3    | chr5  | 149960981 | T | c.-26+2T>C              | Yes (5%) <sup>c</sup>  | 0.9  | 0.99 | 0.99 |
| <i>SPINK1</i>  | NM_003122.3    | chr5  | 147828020 | A | c.194+2T>C <sup>e</sup> | Yes (10%) <sup>b</sup> | 0.35 | 0.99 | 1    |

\*Refer to Lin et al. [16] for the original publications that reported the 45 variants.

<sup>a</sup>Relative expression level is indicated in parentheses.

<sup>b</sup>Expression level determined here by ImageJ using gel photos from the original publications.

<sup>c</sup>Expression level as described in the original publications.

<sup>d</sup>Identical to the *HESX1* IVS2+2T>C substitution in Supplementary Table S2.

<sup>e</sup>Identical to the *SPINK1* IVS3+2T>C substitution in Supplementary Table S2 and Table 2.

**Supplementary Table S2.** Comparison of SpliceAI-predicted and experimentally demonstrated functional effects of the 103 engineered GT>GC (+2T>C) substitutions

| Gene symbol    | mRNA reference | Chr.  | hg38 coordinate | Reference sequence | Variant <sup>a</sup> | Generation of wild-type transcripts <sup>b</sup> | SpliceAI Delta score of donor loss |       |       |
|----------------|----------------|-------|-----------------|--------------------|----------------------|--------------------------------------------------|------------------------------------|-------|-------|
|                |                |       |                 |                    |                      |                                                  | +2T>C                              | +2T>A | +2T>G |
| <i>ACTA1</i>   | NM_001100.3    | chr1  | 229434002       | A                  | IVS1+2T>C            | No                                               | 0.84                               | 0.99  | 0.99  |
|                |                |       | 229432985       | A                  | IVS2+2T>C            | No                                               | 0.87                               | 0.87  | 0.87  |
|                |                |       | 229432554       | A                  | IVS3+2T>C            | No                                               | 0.26                               | 1     | 0.96  |
|                |                |       | 229432268       | A                  | IVS4+2T>C            | No                                               | 0.34                               | 0.98  | 0.98  |
|                |                |       | 229431719       | A                  | IVS6+2T>C            | No                                               | 0.28                               | 1     | 1     |
| <i>AURKC</i>   | NM_001015878.1 | chr19 | 57231789        | T                  | IVS2+2T>C            | No                                               | 0.92                               | 0.96  | 0.96  |
|                |                |       | 57232226        | T                  | IVS3+2T>C            | No                                               | 0.99                               | 1     | 1     |
|                |                |       | 57232682        | T                  | IVS4+2T>C            | No                                               | 0.99                               | 0.99  | 0.99  |
|                |                |       | 57233610        | T                  | IVS5+2T>C            | No                                               | 0.95                               | 0.95  | 0.95  |
|                |                |       | 57235060        | T                  | IVS6+2T>C            | No                                               | 0.8                                | 0.8   | 0.8   |
| <i>CCDC103</i> | NM_213607.2    | chr17 | 44899861        | T                  | IVS1+2T>C            | Yes                                              | 0.82                               | 0.82  | 0.82  |
|                |                |       | 44901654        | T                  | IVS3+2T>C            | No                                               | 0.99                               | 0.99  | 0.99  |
| <i>COX4I1</i>  | NM_001861.4    | chr16 | 85799754        | T                  | IVS1+2T>C            | No                                               | 0.95                               | 0.95  | 0.95  |
|                |                |       | 85801280        | T                  | IVS2+2T>C            | No                                               | 0.92                               | 0.93  | 0.93  |
|                |                |       | 85805106        | T                  | IVS3+2T>C            | No                                               | 0.96                               | 0.99  | 0.99  |
|                |                |       | 85805866        | T                  | IVS4+2T>C            | No                                               | 0.82                               | 1     | 1     |
| <i>COX7A1</i>  | NM_001864.3    | chr19 | 36152391        | A                  | IVS1+2T>C            | No                                               | 0.95                               | 0.96  | 0.96  |
|                |                |       | 36151667        | A                  | IVS2+2T>C            | No                                               | 0.87                               | 0.87  | 0.87  |
| <i>DBI</i>     | NM_001079862.2 | chr2  | 119367062       | T                  | IVS1+2T>C            | No                                               | 0.99                               | 0.99  | 0.99  |
|                |                |       | 119368307       | T                  | IVS2+2T>C            | Yes                                              | 0.86                               | 1     | 1     |
|                |                |       | 119370804       | T                  | IVS3+2T>C            | No                                               | 0.87                               | 1     | 1     |
| <i>DDIT3</i>   | NM_004083.5    | chr12 | 57517704        | A                  | IVS2+2T>C            | No                                               | 0.98                               | 1     | 1     |
|                |                |       | 57517267        | A                  | IVS3+2T>C            | No                                               | 0.46                               | 1     | 1     |
| <i>DNAJC19</i> | NM_145261.3    | chr3  | 180988176       | A                  | IVS2+2T>C            | No                                               | 0.94                               | 0.95  | 0.95  |

|                |                |       |           |   |                        |           |      |      |      |
|----------------|----------------|-------|-----------|---|------------------------|-----------|------|------|------|
|                |                |       | 180985924 | A | IVS5+2T>C              | Yes (42%) | 0.03 | 0.99 | 0.95 |
| <i>FABP1</i>   | NM_001443.2    | chr2  | 88127949  | A | IVS1+2T>C              | No        | 0.96 | 0.99 | 0.99 |
|                |                |       | 88126174  | A | IVS2+2T>C              | No        | 0.97 | 0.98 | 0.98 |
|                |                |       | 88124492  | A | IVS3+2T>C              | No        | 0.98 | 0.98 | 0.98 |
|                |                |       | 122779869 | T | IVS1+2T>C              | No        | 0.83 | 0.84 | 0.84 |
| <i>FABP7</i>   | NM_001446.4    | chr6  | 122780465 | T | IVS2+2T>C              | No        | 0.64 | 1    | 1    |
|                |                |       | 122781196 | T | IVS3+2T>C              | No        | 0.98 | 0.99 | 0.99 |
|                |                |       | 151716227 | T | IVS1+2T>C              | Yes (84%) | 0.08 | 0.96 | 1    |
| <i>FATE1</i>   | NM_033085.2    | chrX  | 151717401 | T | IVS2+2T>C              | No        | 0.98 | 0.99 | 0.99 |
|                |                |       | 151721503 | T | IVS3+2T>C              | No        | 0.99 | 0.99 | 0.99 |
|                |                |       | 151721983 | T | IVS4+2T>C              | No        | 0.92 | 1    | 1    |
|                |                |       | 72136122  | T | IVS2+2T>C              | No        | 0.96 | 1    | 1    |
| <i>FOLR3</i>   | NM_000804.3    | chr11 | 72139151  | T | IVS3+2T>C              | No        | 0.97 | 0.98 | 0.98 |
|                |                |       | 72139484  | T | IVS4+2T>C              | Yes       | 0.45 | 1    | 1    |
|                |                |       | 57199760  | A | IVS1+2T>C              | Yes (2%)  | 0.81 | 0.98 | 0.98 |
| <i>HESX1</i>   | NM_003865.2    | chr3  | 57198751  | A | IVS2+2T>C <sup>c</sup> | No        | 0.92 | 0.93 | 0.93 |
|                |                |       | 57198389  | A | IVS3+2T>C              | No        | 0.96 | 1    | 1    |
|                |                |       | 32442695  | T | IVS2+2T>C              | No        | 0.99 | 0.99 | 0.99 |
| <i>HLA-DRA</i> | NM_019111.4    | chr6  | 32443468  | T | IVS3+2T>C              | No        | 0.98 | 0.99 | 0.99 |
|                |                |       | 32443923  | T | IVS4+2T>C              | No        | 0.93 | 0.99 | 0.99 |
|                |                |       | 18175224  | T | IVS2+2T>C              | No        | 0.25 | 1    | 0.99 |
| <i>IFI30</i>   | NM_006332.4    | chr19 | 18177294  | T | IVS5+2T>C              | No        | 0.98 | 1    | 1    |
|                |                |       | 18177766  | T | IVS6+2T>C              | No        | 0.62 | 1    | 1    |
|                |                |       | 39268580  | T | IVS1+2T>C              | No        | 0.78 | 0.98 | 0.98 |
| <i>IFNL2</i>   | NM_172138.1    | chr19 | 39268860  | T | IVS2+2T>C              | No        | 0.88 | 0.97 | 0.96 |
|                |                |       | 39269231  | T | IVS3+2T>C              | No        | 0.58 | 1    | 1    |
|                |                |       | 39269639  | T | IVS4+2T>C              | No        | 0.99 | 0.99 | 0.99 |
|                |                |       | 39269823  | T | IVS5+2T>C              | Yes (5%)  | 0.05 | 0.84 | 0.73 |
|                |                |       | 206772269 | A | IVS1+2T>C              | No        | 0.56 | 0.99 | 0.96 |
|                | NM_000572.3    | chr1  | 206771354 | A | IVS2+2T>C              | No        | 0.23 | 0.99 | 1    |
|                |                |       | 206770905 | A | IVS3+2T>C              | Yes       | 0.61 | 1    | 1    |
|                |                |       | 206769827 | A | IVS4+2T>C              | No        | 0.44 | 1    | 1    |
|                |                |       | 54159562  | A | IVS1+2T>C              | No        | 0.22 | 0.99 | 1    |
| <i>LENG1</i>   | NM_024316.2    | chr19 | 54158280  | A | IVS2+2T>C              | No        | 0.89 | 1    | 1    |
|                |                |       | 54156761  | A | IVS3+2T>C              | No        | 0.87 | 0.87 | 0.87 |
|                |                |       | 31707789  | T | IVS2+2T>C              | No        | 0.60 | 0.98 | 0.98 |
| <i>LY6G6F</i>  | NM_001003693.1 | chr6  | 31708136  | T | IVS3+2T>C              | No        | 0.81 | 0.81 | 0.81 |
|                |                |       | 31710183  | T | IVS4+2T>C              | No        | 0.76 | 0.9  | 0.9  |
|                |                |       | 31710420  | T | IVS5+2T>C              | No        | 0.3  | 0.3  | 0.3  |
|                |                |       | 14885729  | A | IVS1+2T>C              | No        | 0.98 | 0.99 | 0.99 |
| <i>MGP</i>     | NM_000900.4    | chr12 | 14884211  | A | IVS2+2T>C              | Yes (80%) | 0.97 | 0.99 | 0.99 |
|                |                |       | 6444490   | T | IVS1+2T>C              | No        | 0.97 | 0.99 | 0.99 |
| <i>PIMREG</i>  | NM_001195228.1 | chr17 | 6445406   | T | IVS2+2T>C              | No        | 0.96 | 0.96 | 0.96 |
|                |                |       | 6449409   | T | IVS4+2T>C              | No        | 0.99 | 1    | 1    |
|                |                |       | 142771024 | T | IVS1+2T>C              | No        | 0.81 | 0.99 | 0.98 |
| <i>PRSS2</i>   | NM_002770.3    | chr7  | 142772210 | T | IVS2+2T>C              | No        | 0.98 | 0.98 | 0.98 |
|                |                |       | 142773521 | T | IVS3+2T>C              | No        | 0.75 | 1    | 0.99 |
|                |                |       | 142774057 | T | IVS4+2T>C              | No        | 0.97 | 0.97 | 0.97 |
|                |                |       | 63827925  | T | IVS1+2T>C              | No        | 0.93 | 0.98 | 0.98 |
| <i>PSMC5</i>   | NM_001199163.1 | chr17 | 63830191  | T | IVS5+2T>C              | No        | 0.76 | 0.77 | 0.77 |
|                |                |       | 63830503  | T | IVS6+2T>C              | Yes (56%) | 0.31 | 0.98 | 1    |
|                |                |       | 63830937  | T | IVS7+2T>C              | No        | 0.96 | 0.96 | 0.96 |
|                |                |       | 63831228  | T | IVS8+2T>C              | Yes (56%) | 0.21 | 1    | 1    |
|                |                |       | 63831427  | T | IVS9+2T>C              | No        | 0.95 | 0.99 | 0.99 |
|                |                |       | 63831618  | T | IVS10+2T>C             | Yes (46%) | 0.83 | 1    | 1    |
|                |                |       | 23691831  | T | IVS1+2T>C              | No        | 0.85 | 0.99 | 0.99 |
| <i>RPL11</i>   | NM_000975.5    | chr1  | 23692761  | T | IVS2+2T>C              | Yes       | 0    | 0.87 | 0.86 |
|                |                |       | 23693915  | T | IVS3+2T>C              | Yes       | 0.74 | 1    | 1    |

|                |             |       |           |   |                        |           |      |      |      |
|----------------|-------------|-------|-----------|---|------------------------|-----------|------|------|------|
|                |             |       | 23694793  | T | IVS4+2T>C              | No        | 0.94 | 0.94 | 0.94 |
|                |             |       | 23695910  | T | IVS5+2T>C              | No        | 0.59 | 0.59 | 0.59 |
| <i>RPS17</i>   | NM_001021.4 | chr15 | 82540424  | A | IVS1+2T>C              | No        | 0.95 | 0.98 | 0.98 |
|                |             |       | 82539979  | A | IVS2+2T>C              | No        | 0.51 | 0.99 | 0.99 |
|                |             |       | 82538878  | A | IVS3+2T>C              | No        | 0.99 | 1    | 1    |
| <i>RPS20</i>   | NM_001023.3 | chr8  | 56074379  | A | IVS1+2T>C              | No        | 0.98 | 0.99 | 0.99 |
|                |             |       | 56074058  | A | IVS2+2T>C              | No        | 0.95 | 0.99 | 0.99 |
|                |             |       | 56073693  | A | IVS3+2T>C              | No        | 0.99 | 1    | 1    |
| <i>RPS27</i>   | NM_001030.4 | chr1  | 153990804 | T | IVS1+2T>C              | No        | 0.93 | 0.94 | 0.94 |
|                |             |       | 153991225 | T | IVS2+2T>C              | Yes (63%) | 0.67 | 1    | 1    |
|                |             |       | 153991678 | T | IVS3+2T>C              | Yes       | 0.98 | 1    | 1    |
| <i>SELENOS</i> | NM_203472.2 | chr15 | 101277340 | A | IVS1+2T>C              | Yes       | 0.81 | 1    | 1    |
|                |             |       | 101276539 | A | IVS2+2T>C              | No        | 0.96 | 1    | 1    |
|                |             |       | 101274590 | A | IVS4+2T>C              | No        | 0.97 | 0.98 | 0.98 |
|                |             |       | 101274418 | A | IVS5+2T>C              | Yes (14%) | 0.79 | 1    | 1    |
|                |             |       | 101272762 | A | IVS6+2T>C              | No        | 0.64 | 0.64 | 0.64 |
| <i>SPINK1</i>  | NM_003122.3 | chr5  | 147831521 | A | IVS1+2T>C              | No        | 0.85 | 0.86 | 0.86 |
|                |             |       | 147829597 | A | IVS2+2T>C              | No        | 0.97 | 0.97 | 0.97 |
|                |             |       | 147828020 | A | IVS3+2T>C <sup>d</sup> | Yes       | 0.35 | 0.99 | 1    |
| <i>UQCRB</i>   | NM_006294.4 | chr8  | 96235510  | A | IVS1+2T>C              | No        | 0.97 | 0.99 | 0.99 |
|                |             |       | 96231772  | A | IVS3+2T>C              | No        | 1    | 1    | 1    |

<sup>a</sup>In accordance with the traditional IVS (InterVening Sequence; i.e., an intron) nomenclature as previously described [16].

<sup>b</sup>Expression level (in parentheses), determined by quantitative RT-PCR analysis, was available for all +2T>C substitutions that generated only wild-type transcripts under the experimental conditions described in Lin et al. [16].

<sup>c</sup>Identical to the *HESX1* c.357+2T>C variant in Supplementary Table S1.

<sup>d</sup>Identical to the *SPINK1* c.194+2T>C variant in Supplementary Table S1 and Table 1.

**Supplementary Table S3.** Confusion matrix using a threshold value of 0.85 derived from Supplementary Table S2

|                                                                                                                   |                                                                                                               |
|-------------------------------------------------------------------------------------------------------------------|---------------------------------------------------------------------------------------------------------------|
| <b>True positive (TP):</b> SpliceAI identifies a splicing event (>0.85) which produces no transcript              | <b>False positive (FP):</b> SpliceAI identifies a splicing event (>0.85) which does produce transcript        |
| <b>False negative (FN):</b> SpliceAI does not identify a splicing event (<0.85) which does not produce transcript | <b>True negative (TN):</b> Splice AI does not identify a splicing event (<0.85) which does produce transcript |
| TP:57                                                                                                             | FP:3                                                                                                          |
| FN:27                                                                                                             | TN:16                                                                                                         |

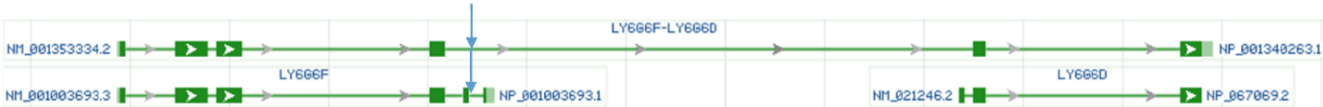

Supplementary Figure S1. Transcript isoforms of the *LY6G6F* gene. The approximate position of the discussed +2T site is indicated by arrow.

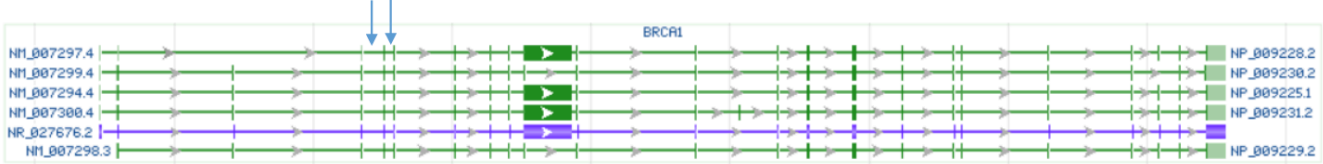

Supplementary Figure S2. Transcript isoforms of the *BRCA1* gene. The two discussed introns are indicated by arrows.
